# Supplementary material
Source: MDPI journal article supplement (https://www.mdpi.com/2071-1050/16/2/748)
Supplement: s1 [file s1]

# Supplementary material

**Table S1.** Quality control and assurance of the elements determined by INAA.

| Element | Reference material | Certified values | Error, % | Determined value | Error, % | Recovery |
|---------|--------------------|------------------|----------|------------------|----------|----------|
| As      | 2710               | 626              | 6.1      | 615              | 5.9      | 98.21    |
| Au      | 2710               | 0.6              | 10       | 0.595            | 7        | 99.16    |
| Ba      | 1633b              | 709              | 3.8      | 715              | 3.7      | 100.84   |
| Br      | 1632c              | 18.7             | 2.1      | 18.9             | 2.4      | 101.06   |
| Ca      | 1515               | 15260            | 1.0      | 15340            | 2        | 100.52   |
| Ce      | 1632c              | 11.9             | 1.7      | 11.8             | 2        | 99.15    |
| Cl      | 1633c              | 1139             | 3.6      | 1153             | 3.9      | 101.21   |
| Co      | 1632c              | 3.48             | 5.7      | 3.44             | 5.5      | 98.84    |
| Cr      | 1633b              | 198.2            | 2.4      | 196.4            | 3        | 99.08    |
| Cs      | 1632c              | 0.594            | 1.7      | 0.592            | 2.4      | 99.66    |
| Fe      | 1633b              | 77800            | 3        | 77845            | 2.7      | 100.06   |
| Hf      | 1632c              | 0.585            | 1.8      | 0.583            | 2        | 99.66    |
| I       | 1515               | 0.3              | 10       | 0.29             | 7.4      | 96.55    |
| K       | 1633b              | 19500            | 1.5      | 19430            | 1.7      | 99.64    |
| La      | 1633b              | 94               | 10       | 92               | 8.3      | 97.83    |
| Mg      | 1515               | 2710             | 3        | 2719             | 3.2      | 100.33   |
| Mn      | 1575a              | 488              | 2.5      | 476              | 2.9      | 97.48    |
| Mo      | 2710               | 19               | 10       | 18.4             | 7.8      | 96.74    |
| Na      | 2710               | 11400            | 5.3      | 11340            | 4.8      | 99.47    |
| Nd      | 1633b              | 85               | 10       | 84.6             | 5.7      | 99.53    |
| Ni      | 1633b              | 120              | 1.5      | 124              | 2.2      | 103.23   |
| Rb      | 1632c              | 7.52             | 4.4      | 7.5              | 4.2      | 99.73    |
| Sb      | 2710               | 38.4             | 7.8      | 37.7             | 7.4      | 98.14    |
| Sc      | 1632c              | 2.9              | 1.2      | 2.91             | 2.2      | 100.34   |
| Se      | 1633b              | 10.26            | 1.7      | 10.43            | 2.5      | 101.63   |
| Sm      | 1632c              | 1.078            | 2.7      | 1.05             | 3.6      | 97.33    |
| Sr      | 1633b              | 1041             | 1.3      | 1054             | 2.2      | 101.23   |
| Ta      | 1633b              | 1.8              | 10       | 1.76             | 8.9      | 97.73    |
| Tb      | 1633b              | 2.6              | 10       | 2.54             | 8.5      | 97.64    |
| Th      | 1633b              | 25.7             | 5.1      | 26.1             | 5        | 101.53   |
| Ti      | 1632c              | 517              | 6.2      | 514              | 6.8      | 99.42    |
| U       | 1633b              | 8.79             | 4.1      | 8.8              | 4.3      | 100.11   |
| V       | 1632c              | 23.72            | 2.2      | 23.4             | 1.1      | 98.63    |
| W       | 1633b              | 93               | 10       | 95               | 8.6      | 102.11   |
| Zn      | 2710               | 6952             | 1.3      | 6958             | 1.7      | 100.09   |

Standard Reference Materials (SRM), produced by the National Institute of Standards and Technology (NIST): NIST SRM 1633c-Coal Fly Ash, NIST SRM 1633b-Coal Fly Ash, NIST SRM 2710-Montana Soil, NIST SRM 1575a-Pine Needles, NIST SRM 1515-Apple Leaves.

**Table S2.** Quality control and assurance of the elements determined by ICP\_AES and cold vapor AAS.

| Element | M2 [35]                  |                      | M3 [35]                  |                      |
|---------|--------------------------|----------------------|--------------------------|----------------------|
|         | Certified value $\pm$ SD | Found value $\pm$ SD | Certified value $\pm$ SD | Found value $\pm$ SD |
| Cd*     | 0.454 $\pm$ 0.019        | 0.420 $\pm$ 0.04     | 0.106 $\pm$ 0.005        | 0.100 $\pm$ 0.014    |
| Cu*     | 68.7 $\pm$ 2.5           | 68.2 $\pm$ 5.7       | 3.76 $\pm$ 0.23          | 3.81 $\pm$ 0.35      |
| Hg**    | 0.058 $\pm$ 0.005        | 0.060 $\pm$ 0.020    | 0.035 $\pm$ 0.004        | 0.0345 $\pm$ 0.001   |
| Pb*     | 6.37 $\pm$ 0.43          | 6.10 $\pm$ 0.90      | 3.33 $\pm$ 0.25          | 3.40 $\pm$ 0.07      |

\* Analysed by ICP-AES; \*\* analysed by cold vapor AAS

[35] Steinnes, E.; Rühling, Å.; Lippo, H.; Mäkinen, A.; Reference materials for large-scale metal deposition surveys. *Accred Qual Assur.* **1997**, 2, 243–249.
